# Supplementary material for: Mechanistic insights into the inhibition of the CRISPR-Cas surveillance complex by anti-CRISPR protein AcrIF13
Source: PubMed Central journal article supplement — J Biol Chem. 2022 Jan 25;298(3):101636. doi: 10.1016/j.jbc.2022.101636 (PMC8857482; doi:10.1016/j.jbc.2022.101636), 2022-01-25
Supplement: mmc1.pdf [file mmc1.pdf]

**Table S1 Top 10 entries of Dali search results of AcrIF13**

| <b>No.</b> | <b>PDB Chain</b> | <b>Z score</b> | <b>RMSD (Å)</b> | <b>Aligned residues</b> | <b>Molecular name</b>                   |
|------------|------------------|----------------|-----------------|-------------------------|-----------------------------------------|
| 1          | 6n2g-A           | 5.1            | 4.5             | 58                      | Nucleosome assembly protein             |
| 2          | 5wlz-C           | 5.0            | 6.7             | 61                      | DNA repair protein<br>xrcc4,myosin-7    |
| 3          | 2n19-A           | 4.6            | 3.6             | 61                      | Serine/threonine-protein kinase         |
| 4          | 5d0q-C           | 4.6            | 4.5             | 60                      | Outer membrane protein<br>assembly      |
| 5          | 6w3w-A           | 4.2            | 1.8             | 44                      | Denovo ntf2                             |
| 6          | 6mf5-B           | 4.2            | 6.9             | 71                      | Cell cycle serine/threonine-<br>protein |
| 7          | 4nkb-B           | 4.1            | 3.3             | 71                      | Probable serine/threonine-<br>protein   |
| 8          | 4i0o-A           | 4.1            | 8.9             | 55                      | Protein elys                            |
| 9          | lp49-A           | 4.0            | 4.4             | 65                      | Steryl-sulfatase                        |
| 10         | 6dhx-A           | 3.9            | 3.6             | 60                      | Tipc2                                   |

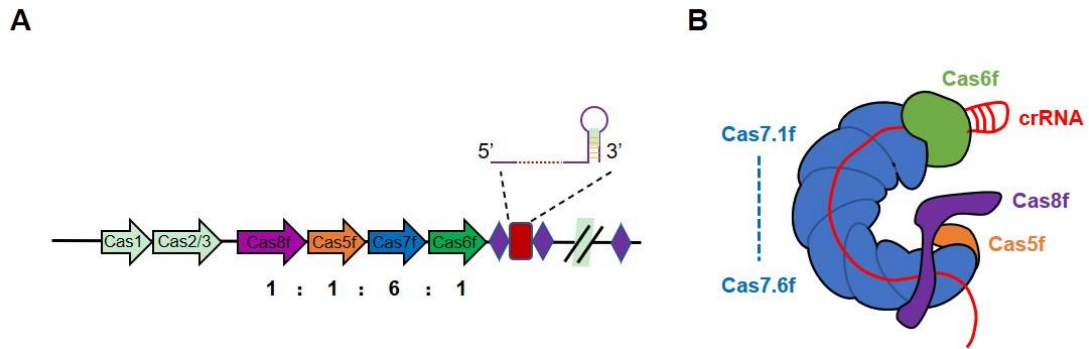

**Figure S1 Schematic representation of the type I-F CRISPR-Cas system**

(A) Schematic representation of the type I-F CRISPR-Cas locus. The type I-F CRISPR-Cas system contains six *cas* genes, four of which encode various Cas proteins that constitute the whole Csy complex with crRNA. The CRISPR array is comprised of invariable repeats (purple diamonds) interspaced with variable phage-derived spacer sequences (red rectangle).

(B) Schematic of 3D structure of Csy complex.

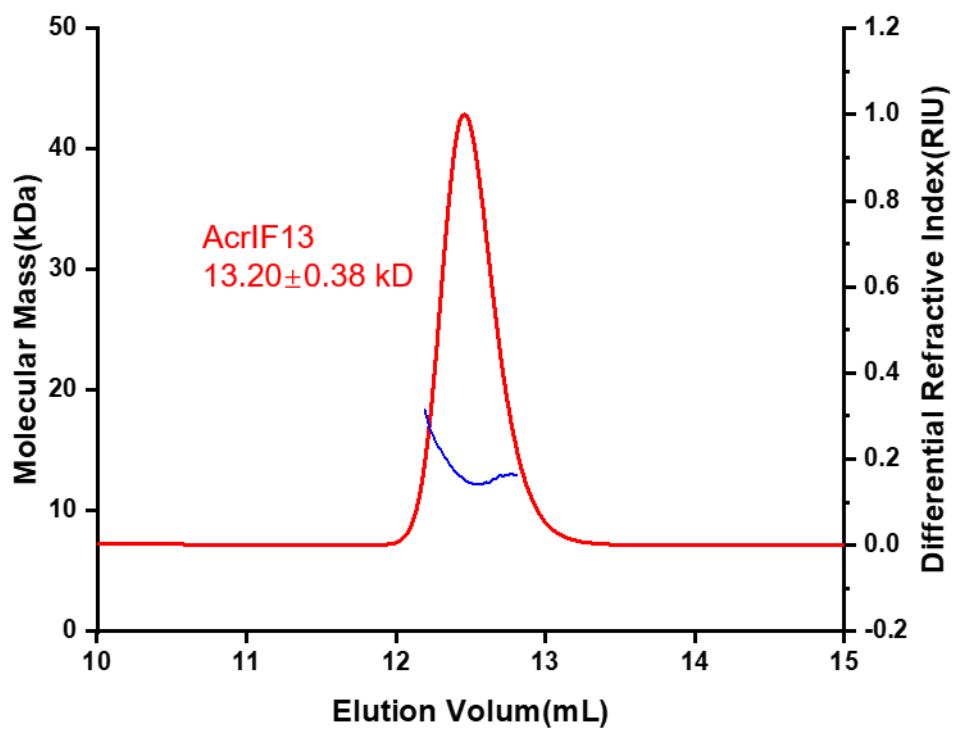

**Figure S2 AcrIF13 is a monomer in solution**

Static light scattering (SLS) study of AcrIF13. The calculated molecular weight of the main peak is shown.

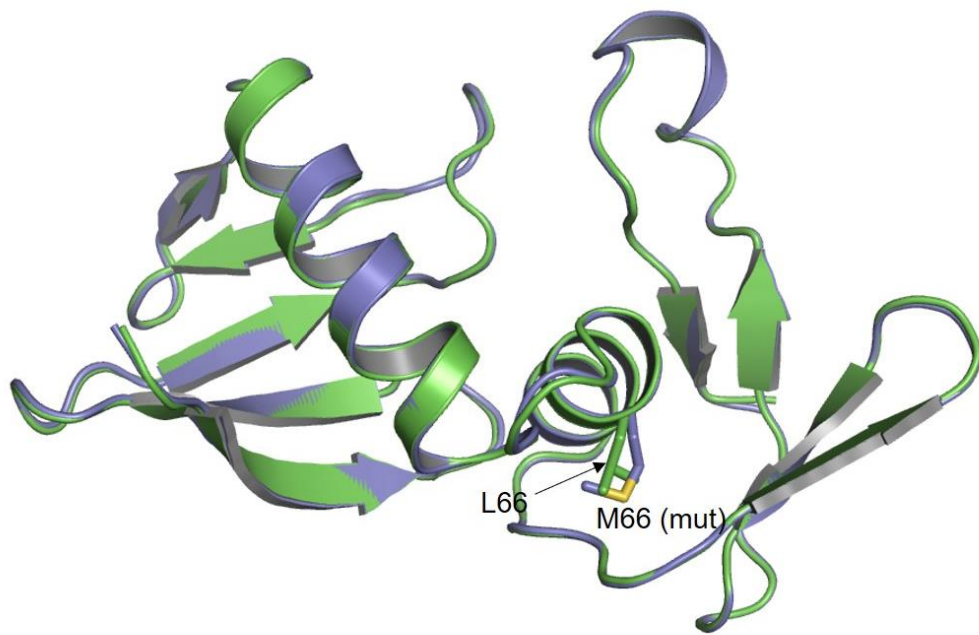

**Figure S3 AcrIF13 is structurally similar as AcrIF13 L66M mutant**

Structural superimposition between AcrIF13 (green) and its L66M mutant (light blue). L66 in AcrIF13 and mutated M66 in AcrIF13 mutant are shown as sticks.

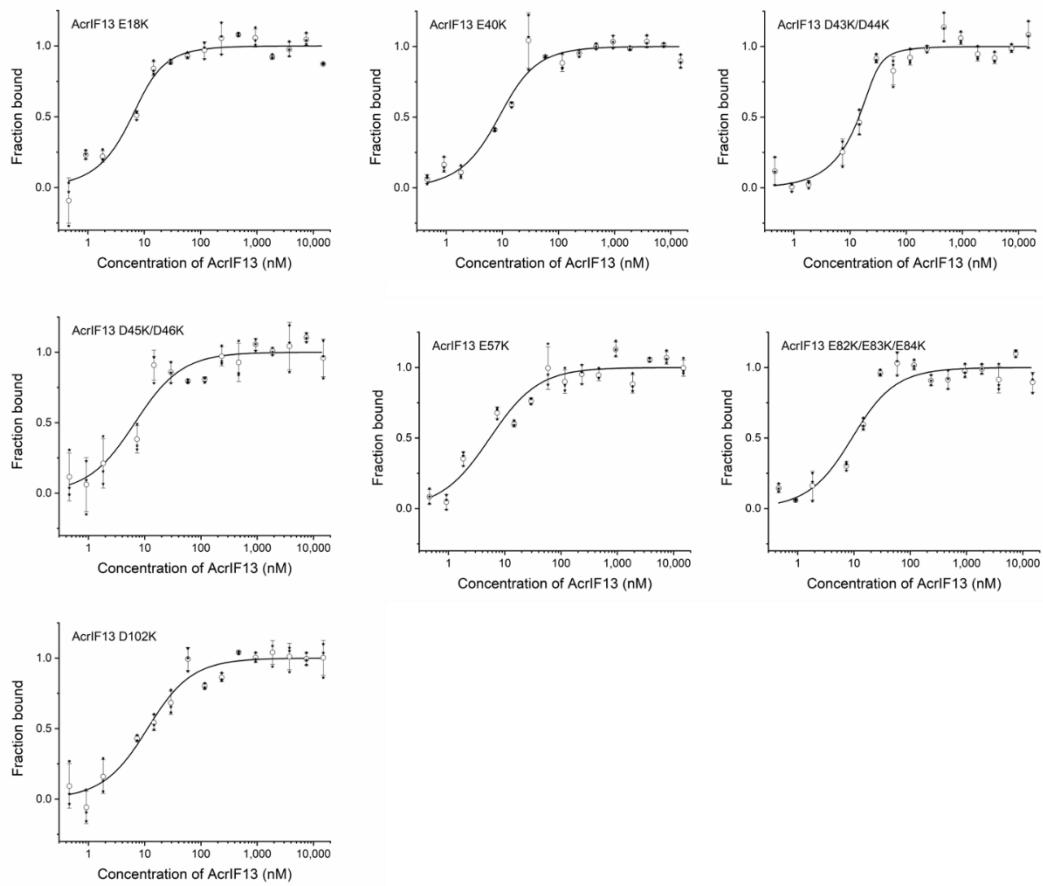

**Figure S4 MST assay of the binding between Csy and AcrIF13 mutants**

MST assays of the binding of Csy to AcrIF13 mutants. Error bars represent SD; n = 3. Binding curves are also shown.

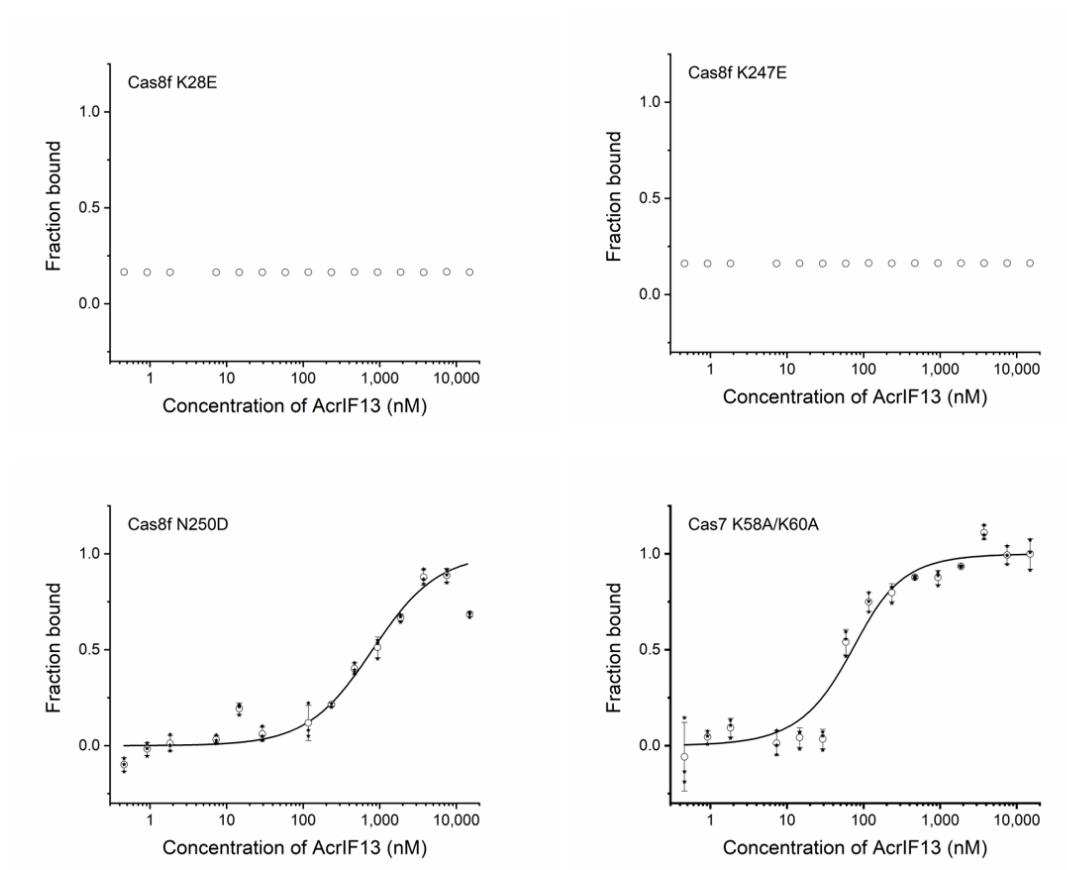

**Figure S5 MST assay of the binding between AcrIF13 and Csy mutants**

MST assays of the binding of AcrIF13 to the Csy mutants. Error bars represent SD;  $n = 3$ . Binding curves are also shown. For the K28E and K247E mutants of the Csy,  $K_D$  could not be determined.

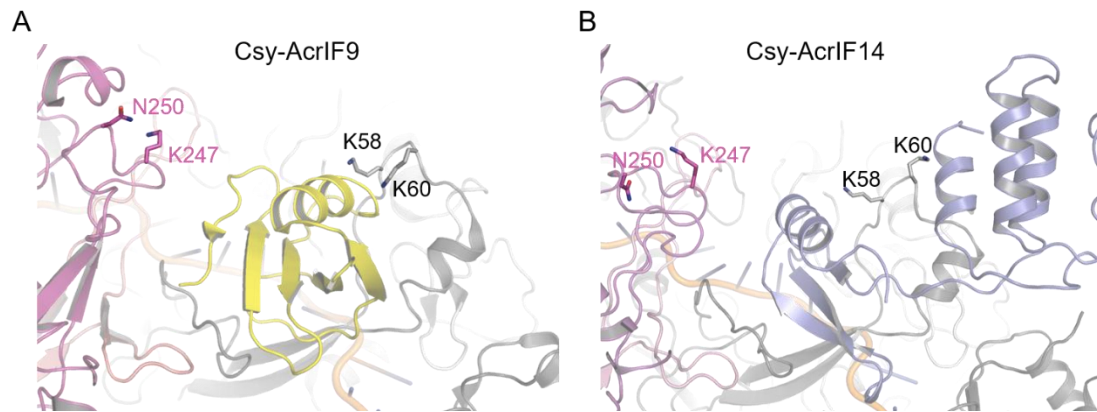

**Figure S6 Structures of Csy-AcrIF9 and Csy-AcrIF14**

(A and B) A closed view of the K58/K60 region of the Csy-AcrIF9 (A, PDB code: 6VQV) and Csy-AcrIF14 (B, PDB code: 7ECV) structures. Cas8f and Cas7.6f are colored in magenta and dark gray, respectively. AcrlF9 and AcrlF14 are colored in yellow and marine, respectively.
